# Supplementary material
Source: Springer Nature journal article supplement (https://www.springermedizin.de/resource/supplementary/13256_2010_1531_MOESM1_ESM.pdf/9647882)

# Prevertebral widening

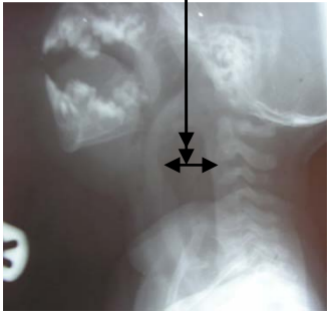

Supplement: MOESM1 [file 9647882]
